# Supplementary material for: Genome characteristics and type IV effector protein repertoire of Coxiella burnetii depend rather on Genomic Groups than on host species
Source: Research Square preprint supplement (doi:10.21203/rs.3.rs-8306611/v1), 2025-12-19
Supplement: Supplementary file 7 [file f1bc3d97fdf1b2e9a419d9f3.xlsx]

## Sheet: Tabelle1
Accession	Passed qual check	Strain	BioProject Accession	BioSample Accession	Collection Date	Isolation Country	Host Name	Host Common Name	Genomic Group	Genome size [bp]	Number of contigs	GC (%)	CDSs	pseudogenes	hypotheticals	tRNAs	tmRNAs	rRNAs	ncRNAs	MST_Cox2	MST_Cox5	MST_Cox18	MST_Cox20	MST_Cox22	MST_Cox37	MST_Cox51	MST_Cox56	MST_Cox57	MST_Cox61	MST_ST
this study	true	15QC1192	-	-	2015	Germany	Ovis aries	Sheep	II-a	2056478	2	42.7	2123	118	366	42	1	3	18	3	8	1	6	3	4	7	9	6	3	18
this study	true	15QC1194	-	-	2015	Germany	Ovis aries	Sheep	II-a	2047941	2	42.7	2117	119	363	42	1	3	18	3	8	1	6	3	4	7	9	6	3	18
this study	true	15QC1195	-	-	2015	Germany	Ovis aries	Sheep	II-a	2056478	2	42.7	2122	118	365	42	1	3	18	3	8	1	6	3	4	7	9	6	3	18
this study	true	15QC1196	-	-	2015	Germany	Capra hircus	Goat	II-a	2049784	2	42.7	2116	118	363	42	1	3	18	3	8	1	6	3	4	7	9	6	3	18
this study	true	15QC1197	-	-	2015	Germany	Bos taurus	Cattle	II-a	2056478	2	42.7	2122	118	365	42	1	3	18	3	8	1	6	3	4	7	9	6	3	18
this study	true	15QC1330	-	-	2015	Germany	Bos taurus	Cattle	III	2031094	2	42.6	2074	91	340	43	1	3	19	3	2	6	1	5	10	4	10	6	5	61
this study	true	15QC1343	-	-	2009	Germany	Capra hircus	Goat	II-a	2055136	2	42.7	2122	119	363	42	1	3	18	3	8	1	6	3	4	7	9	6	3	18
this study	true	15QC1346	-	-	2009	Germany	Ovis aries	Sheep	II-a	2055117	2	42.7	2121	119	362	42	1	3	18	3	8	1	6	3	4	7	9	6	3	18
this study	true	15QC1348	-	-	2003	Germany	Ovis aries	Sheep	II-a	2055130	2	42.7	2118	118	362	42	1	3	18	3	8	1	6	3	4	7	9	6	3	18
this study	true	15QC1349	-	-	2003	Germany	Homo sapiens	Human	II-a	2054573	2	42.7	2121	118	366	42	1	3	18	3	8	1	6	3	4	7	9	6	3	18
this study	true	18QC0072	-	-	2018	Germany	Capra hircus	Goat	II-a	2054997	2	42.7	2116	117	360	42	1	3	18	3	8	1	6	3	4	7	9	6	3	18
this study	true	18QC0075	-	-	2018	Germany	Capra hircus	Goat	III	2031176	2	42.6	2074	89	343	43	1	3	18	3	2	6	1	5	10	4	10	6	5	61
this study	true	18QC1769	-	-		USA		Tick	I	2006564	2	42.65	2035	48	314	43	1	3	19	3	8	5	3	4	1	6	7	6	5	16
this study	true	18QC1770	-	-	1999	Germany	Bos taurus	Cattle	III	1992581	39	42.53	2022	73	325	43	1	3	19	3	2	6	1	5	10	4	10	6	5	61
this study	true	18QC1771	-	-	2001	Germany	Bos taurus	Cattle	II-a	2055119	2	42.7	2121	117	363	42	1	3	18	3	8	1	6	3	4	7	9	6	3	18
this study	true	18QC1773	-	-	1999	Germany	Ovis aries	Sheep	II-a	2055032	2	42.7	2119	117	360	42	1	3	18	3	8	1	6	3	4	7	9	6	3	18
this study	true	18QC1774	-	-	1998	Germany	Capra hircus	Goat	II-a	2055121	2	42.7	2121	118	362	42	1	3	18	3	8	1	6	3	4	7	9	6	3	18
this study	true	18QC1775	-	-	2004	Germany	Capra hircus	Goat	II-a	2056410	2	42.7	2123	120	364	42	1	3	18	3	8	1	6	3	4	7	9	6	3	18
this study	true	19QC0291	-	-	2019	Germany	Bos taurus	Cattle	III	2028650	2	42.61	2068	90	337	43	1	3	19	3	2	6	1	5	10	4	10	6	5	61
this study	true	21QC0776	-	-	2021	Germany	Bos taurus	Cattle	III	2031216	2	42.6	2073	91	341	43	1	3	19	3	2	6	1	5	10	4	10	6	5	61
this study	true	21QC0869	-	-	2021	Germany	Bos taurus	Cattle	III	2026748	2	42.6	2065	90	341	43	1	3	19	3	2	6	1	5	10	4	10	6	5	61
this study	true	22QC0001	-	-	2011	Germany	Bos taurus	Cattle	III	2031179	2	42.6	2074	92	341	43	1	3	19	3	2	6	1	5	10	4	10	6	5	61
this study	true	22QC1334	-	-	2003	Germany	Bos taurus	Cattle	II-a	2055034	2	42.7	2119	118	359	42	1	3	18	3	8	1	6	3	4	7	9	6	3	18
this study	true	22QC1335	-	-	2004	Germany	Bos taurus	Cattle	III	2031162	2	42.6	2073	89	342	43	1	3	19	3	2	6	1	5	10	4	10	6	5	61
this study	true	22QC1336	-	-	2007	Germany	Bos taurus	Cattle	III	2031159	2	42.6	2079	96	346	43	1	3	19	3	2	6	1	5	10	4	10	6	5	61
this study	true	22QC1338	-	-	2008	Germany	Bos taurus	Cattle	III	2031057	2	42.6	2073	89	341	43	1	3	19	3	2	6	1	5	10	4	10	6	5	61
this study	true	22QC1339	-	-	2008	Germany	Bos taurus	Cattle	II-a	2056510	2	42.7	2120	119	359	42	1	3	18	3	8	1	6	3	4	7	9	6	3	18
this study	true	22QC1340	-	-	2010	Germany	Bos taurus	Cattle	III	2031130	2	42.6	2073	92	340	43	1	3	19	3	2	6	1	5	10	4	10	6	5	61
this study	true	22QC1341	-	-	2010	Germany	Bos taurus	Cattle	III	2031155	2	42.6	2072	89	341	43	1	3	19	3	2	6	1	5	10	4	10	6	5	61
this study	true	22QC1342	-	-	2011	Germany	Bos taurus	Cattle	III	2031153	2	42.6	2073	90	341	43	1	3	19	3	2	6	1	5	10	4	10	6	5	61
this study	true	22QC1343	-	-	2012	Germany	Bos taurus	Cattle	III	2031159	2	42.6	2072	89	340	43	1	3	19	3	2	6	1	5	10	4	10	6	5	61
this study	true	23QC0408	-	-	2009	Germany	Ovis aries	Sheep	II-b	2118514	2	42.87	2235	140	430	43	1	3	19	7	5	1	6	5	9	9	4	3	2	33
this study	true	23QC0414	-	-	2010	Germany	Ovis aries	Sheep	II-a	2055098	2	42.7	2118	117	361	42	1	3	18	3	8	1	6	3	4	7	9	6	3	18
this study	true	23QC0415	-	-	2010	Germany	Ovis aries	Sheep	II-a	2055119	2	42.7	2121	118	362	42	1	3	18	3	8	1	6	3	4	7	9	6	3	18
this study	true	23QC0422	-	-	2011	USA		Tick	I	2000987	2	42.67	2032	47	315	43	1	3	19	3	8	5	3	4	1	6	7	6	5	16
this study	true	23QC0438	-	-	2010	Germany	Capra hircus	Goat	III	2031157	2	42.6	2071	89	339	43	1	3	19	3	2	6	1	5	10	4	10	6	5	61
this study	true	23QC0439	-	-	2010	Germany	Capra hircus	Goat	III	2031157	2	42.6	2073	89	341	43	1	3	19	3	2	6	1	5	10	4	10	6	5	61
this study	true	23QC0441	-	-	1989	Germany	Ovis aries	Sheep	II-a	2092432	2	42.64	2167	120	380	42	1	3	18	3	8	1	6	3	4	7	9	6	3	18
DRR179087	true	27M	PRJDB8339	SAMD00171911	1992	Japan	Bos taurus	Cow	I	2011480	38	42.54	2012	45	302	43	1	5	19	3	8	5	3	4	1	6	7	6	5	16
DRR179091	true	N95/K604	PRJDB8339	SAMD00171909	1993/1995	Japan	Homo sapiens	Human	I	2009180	38	42.54	2018	45	307	43	1	3	19	3	8	5	3	4	1	6	7	6	5	16
ERR436391	true	Cb_B1	PRJEB5539	SAMEA2377214		France	Bos taurus	Cow	III	2003634	51	42.53	2021	71	321	43	1	3	19	3	2	6	1	5	10	4	10	6	5	61
ERR436392	true	Cb_B18	PRJEB5539	SAMEA2377215	2008	Denmark	Bos taurus	Cow	III	2003444	49	42.54	2020	74	317	43	1	3	19	3	2	6	1	5	10	4	10	6	5	61
ERR436395	true	EV-Cb_BK10	PRJEB5539	SAMEA2377218	2010	Sweden	Bos taurus	Cow	III	2004783	132	42.55	2015	73	313	43	1	3	21	3	2	6	1	5	10	4	10	6	5	61
ERR436396	true	EV-Cb_C13	PRJEB5539	SAMEA2377219	2007	France	Capra hircus	Goat	II-b	2002689	162	42.52	2020	88	327	43	1	3	19	7	5	1	6	5	9	9	4	3	2	33
GCF_000007765.2	true	RSA 493	PRJNA57631	SAMN02603970				Tick	I	2032807	2	42.6	2053	48	315	43	1	3	19	3	8	5	3	4	1	6	7	6	5	16
GCF_000017105.1	true	Dugway 5J108-111	PRJNA16721	SAMN02603436		USA	Dipodomys microps	chisel-toothed kangaroo rat	VI	2212937	2	42.37	2107	69	275	44	1	3	23	10	10	11	10	6	4	12	14	10	10	60
GCF_000019865.1	true	CbuG_Q212	PRJNA19137	SAMN02603766	1982	Canada	Homo sapiens	Human	V	2008870	1	42.63	2064	113	370	43	1	3	17	2	1	4	6	2	3	1	11	1	1	21
GCF_000019885.1	true	CbuK_Q154	PRJNA19139	SAMN02603767	1976	USA	Homo sapiens	Human	IV-a	2102380	2	42.62	2131	129	358	44	1	3	21	5	4	2	5	1	5	3	NA	4	4	novel
GCF_000168875.2	true	MSU Goat Q177	PRJNA17747	SAMN02435866	1980	USA	Capra hircus	Goat	IV-a	2102302	2	42.62	2136	129	360	44	1	3	21	5	4	2	5	1	5	3	3	4	4	8
GCF_000169495.2	true	RSA 334	PRJNA18975	SAMN02435843	1949	Central Africa	Homo sapiens	Human	IV-b	2004584	98	42.68	1961	92	310	41	1	3	19	5	6	3	5	6	5	8	NA	5	6	novel
GCF_000612785.1	true	Cb_C2	PRJEB5844	SAMEA3138976		Denmark/France/Sweden		Ruminants	I	2013749	73	42.53	2022	49	324	44	1	3	19	3	8	5	3	4	1	6	7	6	5	16
GCF_000751935.1	true	DOG UTAD	PRJEB4294	SAMEA2697688	1995	Canada	Canis familiaris	Dog	V	2009004	1	42.54	1991	94	339	43	1	3	17	2	1	4	6	2	3	1	11	1	1	21
GCF_000767035.1	true	Namibia	PRJNA197124	SAMN02045684	1991	Namibia	Capra hircus	Goat	IV-b	2101438	2	42.5	1991	88	302	44	1	3	20	5	6	10	5	6	5	8	13	9	6	30
GCF_000820465.1	true	Cb196_Saudi_Arabia	PRJEB7092	SAMEA2777685	2012	Saudi Arabia	Homo sapiens	Human	IV-b	2006415	3	42.56	2015	89	348	44	1	3	18	5	6	3	2	6	5	8	1	5	6	4
GCF_001572745.1	true	3262	PRJNA305987	SAMN04337144	2009	Netherlands	Capra hircus	Goat	II-b	2130797	2	42.88	2248	140	435	43	1	3	19	7	5	1	6	5	9	9	4	3	2	33
GCF_001572765.1	true	3345937	PRJNA310186	SAMN04448129	2010	Netherlands	Homo sapiens	Human	II-b	2013572	2	42.54	2041	97	354	43	1	3	19	7	5	1	6	NA	9	9	4	3	2	novel
GCF_002247185.1	true	Idaho Goat Q195	PRJNA394747	SAMN07349491	1976	USA	Capra hircus	Goat	III	2005720	39	42.53	2024	71	322	43	1	3	19	3	2	6	1	5	10	4	10	6	5	61
GCF_002247205.1	true	Turkey RSA315	PRJNA394747	SAMN07349494	1948	Turkey	Homo sapiens	Human	I	2006503	33	42.53	2011	44	298	43	1	3	19	3	8	5	3	4	1	6	7	6	5	16
GCF_002247265.1	true	Dyer RSA345	PRJNA394747	SAMN07349492	1938	USA	Homo sapiens	Human	I	2006709	34	42.54	2010	44	298	43	1	3	19	3	8	5	3	4	1	6	7	6	5	16
GCF_002247285.1	true	Ohio 314 RSA270	PRJNA394747	SAMN07349489	1956	USA	Bos taurus	Cow	I	2006227	34	42.54	2011	43	300	43	1	3	19	3	8	5	3	4	1	6	7	6	5	16
GCF_002247335.1	true	California 33 RSA329	PRJNA394747	SAMN07349487	1947	USA	Bos taurus	Cow	I	2006343	34	42.54	2010	42	301	43	1	3	19	3	8	5	3	4	1	6	7	6	5	16
GCF_002247545.1	true	Dugway 7D77-80	PRJNA394747	SAMN07349495	1957	USA	Rodentia	deer mouse or kangaroo rat	VI	2192018	33	42.34	2064	55	268	44	1	3	23	10	10	11	10	6	4	12	14	10	10	60
GCF_002249845.1	true	Ohio 314 RSA338	PRJNA394747	SAMN07349490	1956	USA	Bos taurus	Cow	I	2006232	34	42.54	2010	42	300	43	1	3	19	3	8	5	3	4	1	6	7	6	5	16
GCF_002633885.1	true	Scurry_Q217	PRJNA312482	SAMN04498381	1985/1981?	USA	Homo sapiens	Human	V	1973771	1	42.54	1992	93	333	43	1	3	17	2	1	4	6	2	3	1	11	1	1	21
GCF_002633905.1	true	42785537	PRJNA312452	SAMN04497988	2010	Netherlands	Homo sapiens	Human	II-b	2046808	2	42.6	2086	109	385	43	1	3	19	7	5	1	6	5	9	9	4	3	2	33
GCF_002633925.1	true	CbCVIC1	PRJNA312468	SAMN04498366	2010	Netherlands	Capra hircus	Goat	II-b	2037066	2	42.59	2073	106	381	43	1	3	19	7	5	1	6	NA	9	9	4	3	2	novel
GCF_002633945.1	true	14160-001	PRJNA312566	SAMN04500723	2009	Netherlands	Capra hircus	Goat	III	2004775	2	42.53	2022	73	323	43	1	3	19	3	2	6	1	5	10	4	10	6	5	61
GCF_002633965.1	true	701CbB1	PRJNA312570	SAMN04500790	2005	France	Bos taurus	Cow	III	2007705	2	42.53	2025	74	322	43	1	3	19	3	2	6	1	5	10	4	10	6	5	61
GCF_002633985.1	true	2574	PRJNA312572	SAMN04500793	2009	Netherlands	Bos taurus	Cow	III	2007582	2	42.52	2020	71	322	43	1	3	19	3	2	6	1	5	10	4	10	6	5	61
GCF_002634005.1	true	18430	PRJNA312574	SAMN04500794	2009	Netherlands	Ovis aries	Sheep	III	2005688	2	42.54	2024	72	321	43	1	3	19	3	2	6	1	5	10	4	10	6	5	61
GCF_002634025.1	true	Henzerling	PRJNA312577	SAMN04500797	1945	Italy	Homo sapiens	Human	II-a	2000126	2	42.55	2008	83	308	43	1	3	20	3	8	1	6	NA	4	7	9	6	3	novel
GCF_002634045.1	true	Heizberg	PRJNA312578	SAMN04500798		Greece	Homo sapiens	Human	II-a	1999884	2	42.55	2008	84	310	43	1	3	20	3	NA	1	6	NA	4	7	9	6	3	novel
GCF_002634065.1	true	Schperling	PRJNA312608	SAMN04500980	1955	Kyrgyzstan	Homo sapiens	Human	IV-b	2048598	2	42.5	1968	77	286	43	1	3	18	5	6	3	5	6	5	8	1	5	6	2
GCF_002634085.1	true	14160-002	PRJNA312474	SAMN04498377	2009	Netherlands	Capra hircus	Goat	II-b	1993104	2	42.55	2008	91	330	43	1	3	19	NA	5	1	6	5	9	9	4	3	2	novel
GCF_002896735.1	true	Q532	PRJNA430350	SAMN08369798	2013-08-15	United Kingdom	Bos taurus	Cow	III	2001903	38	42.52	2021	70	320	43	1	3	19	3	2	6	1	5	10	4	10	6	5	61
GCF_002896755.1	true	Q545	PRJNA430350	SAMN08369800	2014-09-03	United Kingdom	Bos taurus	Cow	III	2003604	37	42.53	2021	72	321	43	1	3	19	3	2	6	1	5	10	4	10	6	5	61
GCF_002896775.1	true	Q556	PRJNA430350	SAMN08369801	2015-02-17	United Kingdom	Bos taurus	Cow	III	2004954	42	42.53	2019	71	319	43	1	3	19	3	2	6	1	5	10	4	10	6	5	61
GCF_002896835.1	true	Q559	PRJNA430350	SAMN08369802	2015-03-04	United Kingdom	Ovis aries	Sheep	III	2004244	39	42.53	2022	70	323	43	1	3	19	3	2	6	1	5	10	4	10	6	5	61
GCF_003849965.1	true	DSTL_1R	PRJNA506366	SAMN10458492	2016-03	United Kingdom	Bos taurus	Cow	III	2000727	42	42.53	2016	71	316	43	1	3	19	3	2	6	1	5	10	4	10	6	5	61
GCF_024918495.1	true	CB132	PRJNA871194	SAMN30429672	2014	Belgium	Homo sapiens	Human	II-c	1996301	1	42.6	1942	68	295	43	1	3	17	6	5	1	6	5	4	5	4	3	2	11
GCF_024918535.1	true	CB80	PRJNA871194	SAMN30429678	2014	France	Homo sapiens	Human	II-b	1995939	1	42.63	1949	72	294	43	1	3	17	7	5	1	6	5	9	9	4	NA	2	novel
GCF_024918555.1	true	CB68	PRJNA871194	SAMN30429677	2013	France		Mouse	IV-a	1996291	1	42.63	1916	86	279	43	1	3	18	1	6	2	6	1	NA	NA	NA	4	6	novel
GCF_024918575.1	true	CB155	PRJNA871194	SAMN30429674	2014	United Kingdom	Homo sapiens	Human	IV-a	1996133	1	42.65	1901	84	268	43	1	3	18	5	6	9	6	8	5	NA	NA	4	6	novel
GCF_024918595.1	true	CB121	PRJNA871194	SAMN30429670	2014	Switzerland	Homo sapiens	Human	II-c	1995888	1	42.62	1959	88	300	43	1	3	16	3	5	1	6	5	4	NA	4	3	2	novel
GCF_024918615.1	true	CB13	PRJNA871194	SAMN30429671	2014	France	Homo sapiens	Human	II-c	1996299	1	42.61	1952	71	303	43	1	3	18	6	5	1	6	5	4	5	4	3	2	11
GCF_024918635.1	true	BRASOV	PRJNA871194	SAMN30429669	2013	Romania	Homo sapiens	Human	I	1996222	1	42.66	1913	44	274	42	1	3	18	3	8	5	3	4	NA	6	7	6	5	novel
GCF_024918655.1	true	CB149	PRJNA871194	SAMN30429673	2013	Senegal		Tick	IV-b	1996490	1	42.65	1871	64	242	43	1	3	17	NA	6	8	6	6	NA	8	NA	NA	6	novel
GCF_024918675.1	true	CB170	PRJNA871194	SAMN30429675	2014	USA	Homo sapiens	Human	IV-a	1996109	1	42.63	1909	78	269	43	1	3	18	5	6	2	6	1	NA	3	NA	4	4	novel
GCF_024918695.1	true	CB180	PRJNA871194	SAMN30429676	2013	France	Homo sapiens	Human	II-a	1995665	1	42.59	1945	64	288	43	1	3	18	3	8	1	6	3	4	7	9	NA	3	novel
GCF_025989895.1	true	Z2534	PRJNA871194	SAMN30428952	2014	Austria	Capra hircus	Goat	II-c	2094156	115	42.83	2205	133	424	43	1	3	20	3	5	NA	6	5	4	5	12	3	2	novel
GCF_025989925.1	true	CB224	PRJNA871194	SAMN30428949	2016	France	Homo sapiens	Human	IV-a	2070480	72	42.53	2086	137	365	44	1	3	22	5	4	NA	5	1	5	3	3	4	4	novel
GCF_025989955.1	true	Q229	PRJNA871194	SAMN30428951	2015	France	Homo sapiens	Human	V	1975920	41	42.54	1999	98	343	43	1	3	18	2	1	NA	6	2	3	1	11	1	1	novel
GCF_025990005.1	true	CB85	PRJNA871194	SAMN30428943	2014	France	Homo sapiens	Human	II-b	1995399	117	42.53	2015	85	325	43	1	3	19	7	5	1	6	5	9	9	4	3	2	33
GCF_025990095.1	true	CB69	PRJNA871194	SAMN30428941	2014	France	Homo sapiens	Human	II-c	2089068	115	42.81	2211	137	426	43	1	3	19	3	5	1	6	5	4	5	5	3	2	13
GCF_025990275.1	true	CB221	PRJNA871194	SAMN30428934	2016	France		Tick	I	2007392	32	42.54	2016	45	303	43	1	3	19	3	8	5	3	4	1	6	7	6	5	16
GCF_025990295.1	true	CB218	PRJNA871194	SAMN30428932	2016	France	Homo sapiens	Human	III	2006229	38	42.53	2024	72	323	43	1	3	20	3	2	6	1	5	10	4	10	6	5	61
GCF_025990315.1	true	CB215	PRJNA871194	SAMN30428929	2016	France	Homo sapiens	Human	II-c	2095327	114	42.83	2212	139	426	43	1	3	19	3	5	NA	6	5	4	5	5	3	2	novel
GCF_025990355.1	true	CB216	PRJNA871194	SAMN30428930	2016	France	Homo sapiens	Human	II-b	2068771	114	42.75	2208	134	428	43	1	3	19	7	5	NA	6	5	9	9	4	3	2	novel
GCF_025990375.1	true	CB213	PRJNA871194	SAMN30428928	2016	France	Homo sapiens	Human	II-c	2078275	115	42.77	2200	118	419	43	1	3	19	3	5	NA	6	5	4	5	12	3	2	novel
GCF_025990395.1	true	CB212B	PRJNA871194	SAMN30428927	2016	France	Homo sapiens	Human	III	2004569	40	42.53	2020	70	320	43	1	3	21	3	2	6	1	5	10	4	10	6	5	61
GCF_025990455.1	true	CB212A	PRJNA871194	SAMN30428926	2016	France	Homo sapiens	Human	I	2032747	67	42.6	2016	46	304	43	1	3	19	3	8	NA	3	4	1	6	7	6	5	novel
GCF_025990495.1	true	CB202	PRJNA871194	SAMN30428922	2015	France	Homo sapiens	Human	IV-b	2048912	86	42.49	1969	78	288	44	1	3	20	NA	3	3	5	6	5	8	2	5	6	novel
GCF_025990535.1	true	CB198	PRJNA871194	SAMN30428919	2015	France	Homo sapiens	Human	IV-b	2040473	77	42.51	1965	85	283	43	1	3	18	5	6	3	4	6	5	8	1	5	6	1
GCF_025990565.1	true	CB201	PRJNA871194	SAMN30428921	2016	France	Homo sapiens	Human	IV-b	2057855	70	42.54	2034	85	343	44	1	3	20	5	6	NA	2	6	5	8	1	5	6	novel
GCF_025990595.1	true	CB190	PRJNA871194	SAMN30428916	2014	France	Homo sapiens	Human	IV-a	2056630	68	42.48	2030	115	329	44	1	3	21	3	4	2	5	1	5	3	3	4	4	novel
GCF_025990615.1	true	CB192	PRJNA871194	SAMN30428917	2015	France	Homo sapiens	Human	IV-a	2059361	69	42.49	2040	115	337	44	1	3	21	5	4	2	5	1	5	3	3	4	4	8
GCF_025990695.1	true	CB162	PRJNA871194	SAMN30428912	2013	USA	Homo sapiens	Human	IV-a	2056209	72	42.49	2024	107	322	44	1	3	21	5	4	NA	5	1	5	3	3	4	4	novel
GCF_025990715.1	true	CB156	PRJNA871194	SAMN30428910	2016	France	Homo sapiens	Human	IV-b	2057142	71	42.51	2053	86	363	44	1	3	20	5	6	3	2	6	5	8	1	5	6	4
GCF_025990755.1	true	CB152	PRJNA871194	SAMN30428909	2013	Senegal		Tick	I	2071506	51	42.44	2073	47	325	44	1	3	22	3	8	5	3	4	1	6	7	6	5	16
GCF_025990765.1	true	CB144	PRJNA871194	SAMN30428908	2013	Senegal	Homo sapiens	Human	II-c	1994221	119	42.52	2020	88	326	43	1	3	20	3	5	NA	6	5	4	5	4	3	2	novel
GCF_025990795.1	true	CB125	PRJNA871194	SAMN30428907	2013	France	Homo sapiens	Human	IV-a	2085547	76	42.43	2056	111	338	44	1	3	21	3	4	NA	5	1	5	3	3	4	4	novel
GCF_025990815.1	true	CB119	PRJNA871194	SAMN30428906	2013	Senegal	Homo sapiens	Human	I-III-like	2018549	47	42.58	2024	59	303	43	1	3	22	3	7	7	8	5	4	11	7	6	5	19
GCF_025990835.1	true	CB10	PRJNA871194	SAMN30428903	2014	France	Homo sapiens	Human	IV-a	2081016	86	42.43	2056	112	334	44	1	3	21	5	4	NA	5	1	5	3	3	4	4	novel
GCF_025990855.1	true	CB111	PRJNA871194	SAMN30428904	2013	France	Homo sapiens	Human	IV-b	2058270	72	42.54	1972	82	287	44	1	3	20	4	6	3	5	6	2	8	2	5	6	5
GCF_025990865.1	true	CB118	PRJNA871194	SAMN30428905	2013	France	Homo sapiens	Human	IV-b	2038883	75	42.5	1960	85	279	43	1	3	19	5	6	3	4	6	7	8	1	5	6	3
GCF_025990895.1	true	CB1	PRJNA871194	SAMN30428902	2014	France	Homo sapiens	Human	IV-b	2046448	78	42.52	1961	85	277	43	1	3	19	5	6	3	4	6	5	8	1	5	6	1
GCF_027627535.1	true	RMSFV	PRJNA880551	SAMN32541682	1944	USA	Homo sapiens	Human	I	2032798	2	42.6	2055	49	317	43	1	3	19	3	8	5	3	4	1	6	7	6	5	16
GCF_027943585.1	true	406	PRJDB8339	SAMD00172303	1993/1995	Japan	Homo sapiens	Human	III	2031247	2	42.6	2074	88	341	43	1	3	19	3	2	6	1	5	10	4	10	6	5	61
GCF_027943605.1	true	VS42	PRJDB8339	SAMD00172302	2001	Japan	Homo sapiens	Human	I	2032523	2	42.6	2057	50	319	43	1	3	19	3	8	5	3	4	1	6	7	6	5	16
GCF_032463305.1	true	CBI_2022	PRJNA977578	SAMN35525502	2022-04-12	Israel	Homo sapiens	Human	IV-b	2058687	47	42.61	2015	79	306	44	1	3	19	4	6	3	5	6	5	8	2	NA	6	novel
SRR12935076	true	Coxiella burnetii CbBEC2 Belgian isolate	PRJNA673130	SAMN16591808	2014-07	Belgium	Capra hircus	Goat	III	2002454	44	42.53	2021	73	319	43	1	3	19	3	2	6	1	5	10	4	10	6	5	61
SRR12935077	true	Coxiella burnetii CbBEB2 Belgian isolate	PRJNA673130	SAMN16591807	2010-05	Belgium	Bos taurus	Cow	III	2002202	43	42.53	2019	76	320	43	1	3	19	3	2	6	1	5	10	4	10	6	5	61
SRR12935078	true	Coxiella burnetii CbBEB1 Belgian isolate	PRJNA673130	SAMN16591806	2010-03	Belgium	Bos taurus	Cow	III	2002448	44	42.53	2021	71	321	43	1	3	19	3	2	6	1	5	10	4	10	6	5	61
SRR22439204	true	Coxiella burnetii strain KZQ3	PRJNA887602	SAMN17672853	2016-05	South Korea	Homo sapiens	Human	IV-a	1986010	114	42.58	1940	102	286	43	1	3	18	5	4	9	5	8	5	14	16	4	6	novel
SRR22439205	true	Coxiella burnetii strain KZQ2	PRJNA887602	SAMN17672854	2016-03	South Korea	Homo sapiens	Human	IV-a	1985074	106	42.58	1941	102	287	43	1	3	18	5	4	9	5	8	5	14	16	4	6	novel
SRR26633117	true	NMC_6982	PRJNA1034651	SAMN38068169	1935	USA		Tick	I	1970206	59	42.61	1983	42	297	43	1	3	19	3	8	5	3	4	1	6	7	6	5	16
SRR3347474	true	ESFL1	PRJNA315907	SAMN04623225	2008	USA		soil	III	2021530	361	42.54	2024	75	322	43	1	3	19	3	2	6	1	5	10	4	10	6	5	61
SRR405074	true	Australian QD	PRJNA68771	SAMN00632086	1939	Australia	Homo sapiens	Human	I	2020263	98	42.55	2017	47	307	46	1	4	19	3	8	5	3	4	1	6	7	6	5	16
SRR405075	true	McMaster (Q172)	PRJNA68771	SAMN00632087			Homo sapiens	Human	V	1997166	122	42.54	2001	97	345	46	1	4	17	2	1	4	6	2	3	1	11	1	1	21
SRR6300869	true	Australia RSA425	PRJNA394745	SAMN07349483	1939	Australia	Homo sapiens	Human	I	2005647	38	42.53	2013	46	300	43	1	3	19	3	8	5	3	4	1	6	7	6	5	16
SRR6300871	true	M44 RSA461	PRJNA394745	SAMN07349484	1945	Greece	Homo sapiens	Human	II-a	1996045	75	42.53	2015	84	313	42	1	3	18	3	8	1	6	3	4	7	9	7	3	25
SRR6300872	true	Nine Mile RSA363	PRJNA394745	SAMN07349485	1935	USA		Tick	I	2006928	39	42.54	2012	44	301	43	1	3	19	3	8	5	3	4	1	6	7	6	5	16
SRR6300873	true	Australia RSA297	PRJNA394745	SAMN07349482	1939	Australia	Homo sapiens	Human	I	2005803	35	42.54	2014	47	302	43	1	3	19	3	8	5	3	4	1	6	7	6	5	16
SRR6300874	true	California 16 RSA350	PRJNA394745	SAMN07349488	1947	USA	Bos taurus	Cow	I	2006901	36	42.53	2015	45	303	43	1	3	19	3	8	5	3	4	1	6	7	6	5	16
SRR6300875	true	Dugway 7E65-68	PRJNA394745	SAMN07349496	1957	USA	Rodentia	deer mouse or kangaroo rat	VI	2191770	40	42.34	2065	50	273	44	1	3	23	10	10	11	10	6	4	12	14	10	10	60
SRR6479428	true	Cb3506	PRJNA430350	SAMN08369797	2014-09-10	United Kingdom	Homo sapiens	Human	NA	1955281	80	42.64	1989	81	325	42	1	3	19	3	8	NA	6	5	NA	10	7	6	NA	novel
SRR6479430	true	Q540	PRJNA430350	SAMN08369799	2014-02-25	United Kingdom	Capra hircus	Goat	II-b	2003786	190	42.53	2020	87	325	43	1	3	19	7	5	1	6	5	9	9	4	3	2	33
SRR8234304	true	DSTL_2	PRJNA506366	SAMN10458618	2016-03-29	United Kingdom	Capra hircus	Goat	II-c	2032661	208	42.49	2056	89	332	43	1	3	19	3	5	1	6	5	4	5	12	3	2	32
SRR8234306	true	DSTL_10	PRJNA506366	SAMN10458627	2016-03-29	United Kingdom	Capra hircus	Goat	II-b	2012712	202	42.5	2028	88	329	43	1	3	19	7	5	1	6	5	9	9	4	3	2	33
SRR8234307	true	DSTL_8	PRJNA506366	SAMN10458551	2016-02-18	United Kingdom	Capra hircus	Goat	II-b	2005133	205	42.53	2017	88	322	43	1	3	19	7	5	1	6	5	9	9	4	3	2	33
